# Supplementary material for: Deep top-down proteomics revealed significant proteoform-level differences between metastatic and nonmetastatic colorectal cancer cells
Source: PubMed Central journal article supplement (PMC9770947; doi:10.1126/sciadv.abq6348), 2022-12-21
Supplement: sciadv.abq6348_sm.pdf [file sciadv.abq6348_sm.pdf]

Supplementary Materials for  
**Deep top-down proteomics revealed significant proteoform-level differences  
between metastatic and nonmetastatic colorectal cancer cells**

Elijah N. McCool *et al.*

Corresponding author: Amanda B. Hummon, hummon.1@osu.edu; Xiaowen Liu, xwliu@tulane.edu;  
Liangliang Sun, lsun@chemistry.msu.edu

*Sci. Adv.* **8**, eabq6348 (2022)  
DOI: 10.1126/sciadv.abq6348

**The PDF file includes:**

Figs. S1 to S12  
Tables S1 to S2  
Legend for lists of identified proteoforms

**Other Supplementary Material for this manuscript includes the following:**

Lists of identified proteoforms

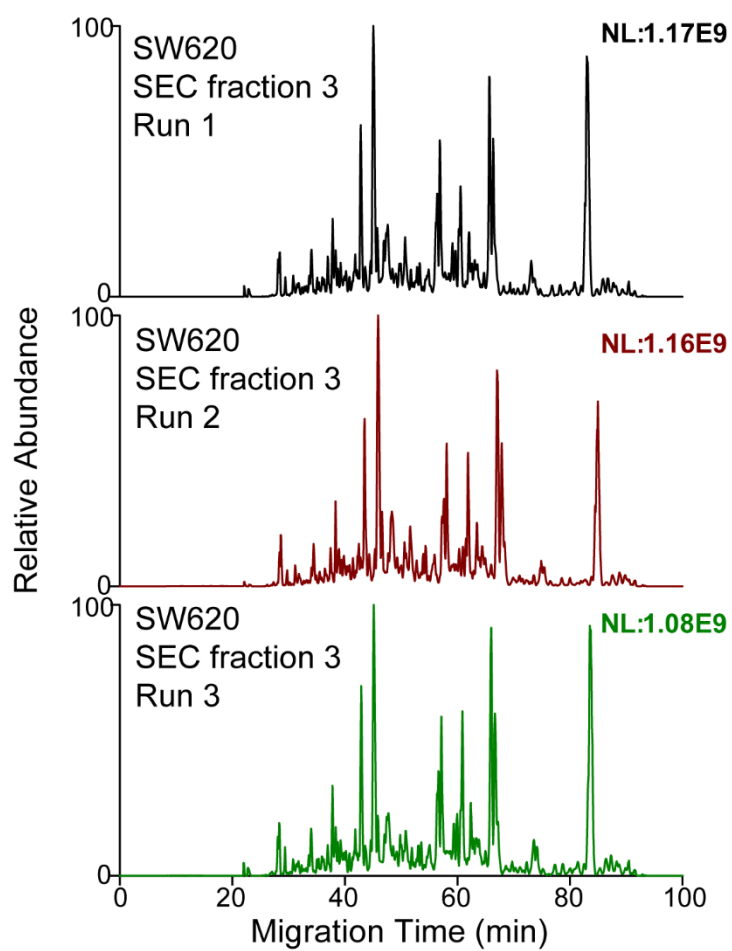

**Fig. S1. Base peak electropherograms of one SEC fraction of the SW620 cell lysate after triplicate CZE-MS/MS analyses.** The data shows good reproducibility of our CZE-MS/MS system for complex proteome sample analysis.

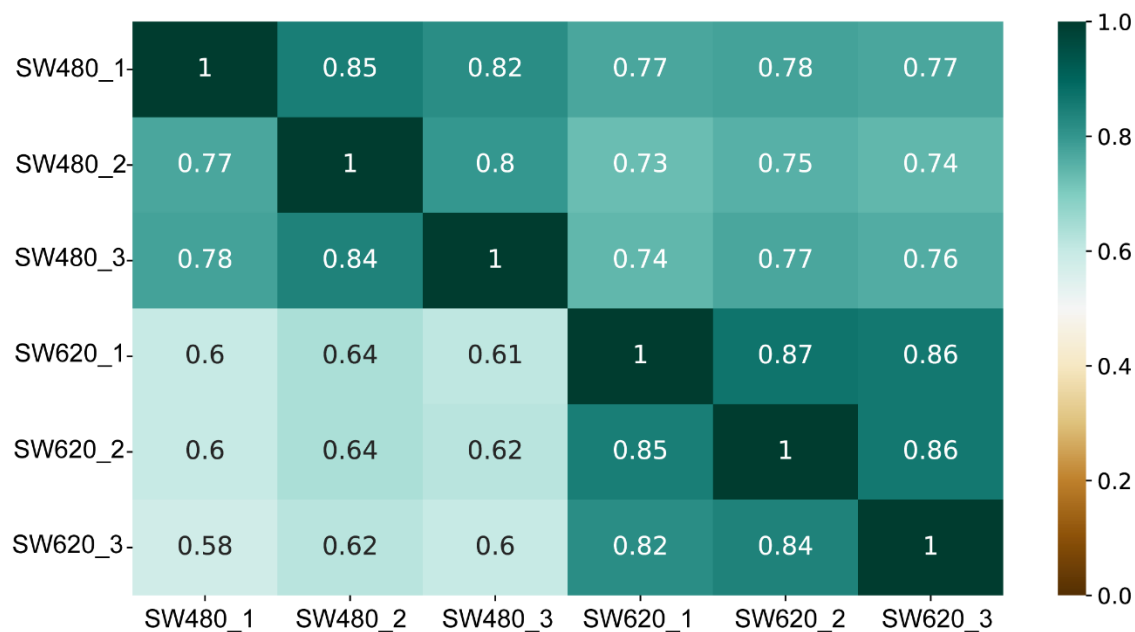

**Fig. S2. Heat map of protein overlaps from technical triplicates of SW480 and SW620 cells using SEC-CZE-MS/MS.** Each number in the figure represents a ratio between the number of shared proteins in two conditions (e.g., SW480\_1 (x-axis) and SW620\_1 (y-axis)) and the total number of identified proteins in one of the two conditions listed on the y-axis (e.g., SW620\_1). For example, the protein overlap between SW480\_1 (x-axis) and SW620\_1 (y-axis) is 0.6, which indicates the ratio between the number of shared proteins in those two conditions and the total number of identified proteins in SW620\_1.

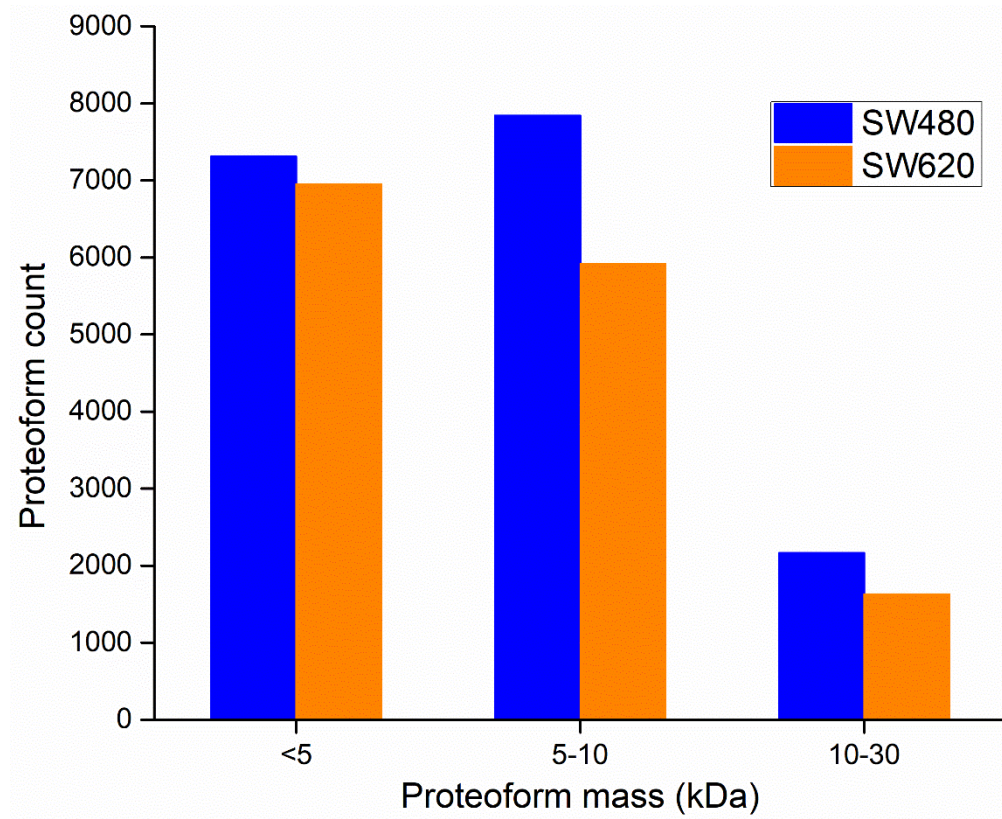

**Fig. S3. The mass distribution of identified proteoforms from SW480 and SW620 cells.** The data are from the combined results of four CZE-MS/MS-based strategies.

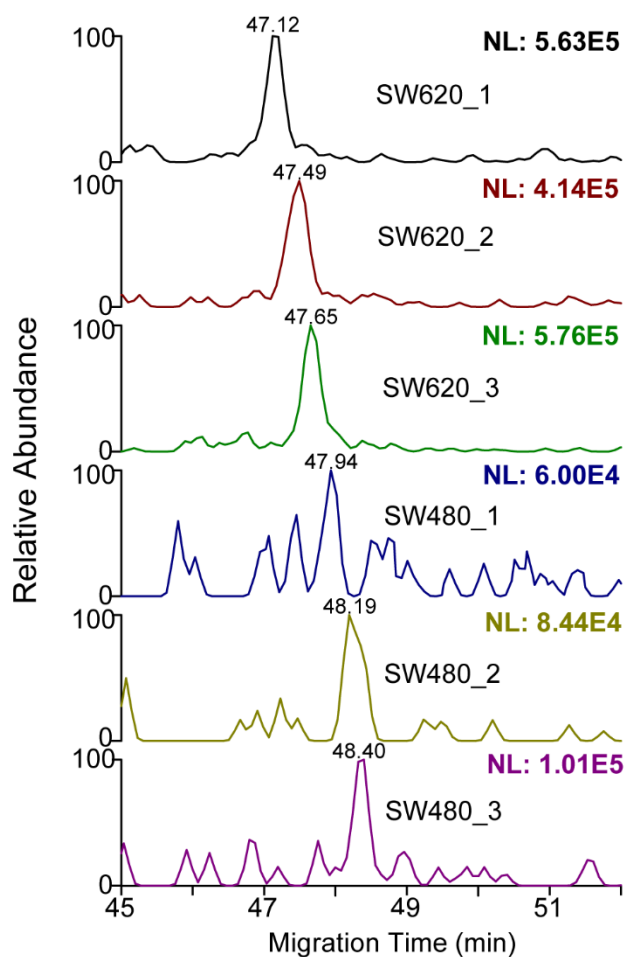

**Fig. S4. Extracted ion electropherograms (EIEs) of one EIF4B phosphorylated proteoform shown in Table 1 from SW480 and SW620 cells after triplicate CZE-MS/MS analyses.** The proteoform sequence is M.AASAKKKNK(KGKTISLTDFL)[mass shift: 122 Da, phosphorylation and acetylation/trimethylation] AEDGGTGGGSTYVSKPVSWADETDDLEGDVSTTWHSNDDDVYRAPPIDRSILPTAPR.A. Precursor m/z corresponding to the identified charge state was extracted using 10 ppm mass tolerance and Gaussian smoothing (5 points). Migration time alignment was performed between the SW480 and SW620 data based on the accurate m/z and charge information.

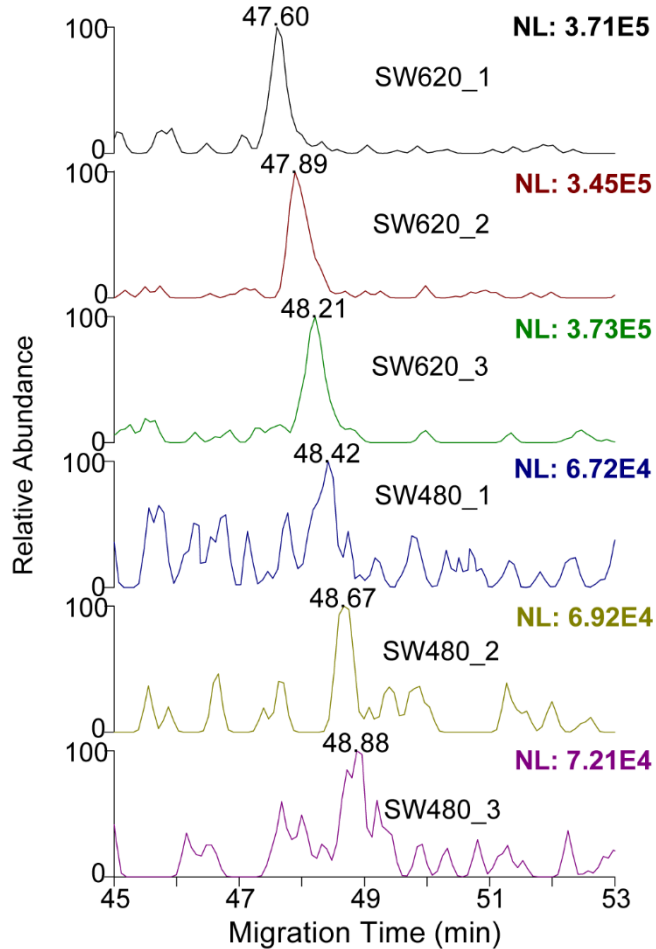

**Fig. S5. Extracted ion electropherograms (EIEs) of one EIF4B phosphorylated proteoform shown in Table 1 from SW480 and SW620 cells after triplicate CZE-MS/MS analyses.** The proteoform sequence is M.(A)[Acetyl]ASAKKKNKKGKTISLTDFLAEDGG(T)[mass shift: 80 Da, phosphorylation]GGGSTYVSKPVSWADETDLDLEGDVSTTWHSNDDDVYRAPPIDR.S. Precursor m/z corresponding to the identified charge state was extracted using 10 ppm mass tolerance and Gaussian smoothing (5 points). Migration time alignment was performed between the SW480 and SW620 data based on the accurate m/z and charge information.

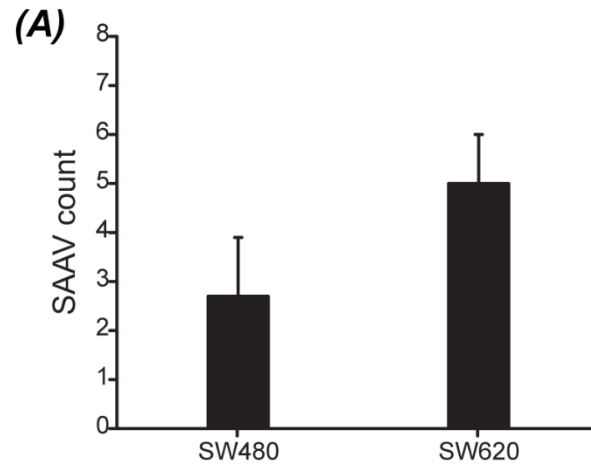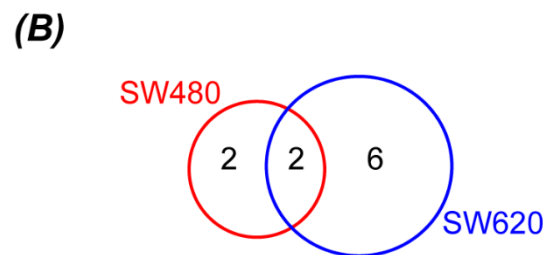

**Fig. S6. The SAAV data of SW480 and SW620 cells from 1D CZE-MS/MS.** (A) The number of identified proteoforms containing SAAVs. The error bars represent the standard deviations of the number of proteoforms from triplicate measurements. (B) The overlap of SAAV containing proteoforms from 1D-CZE-MS/MS.

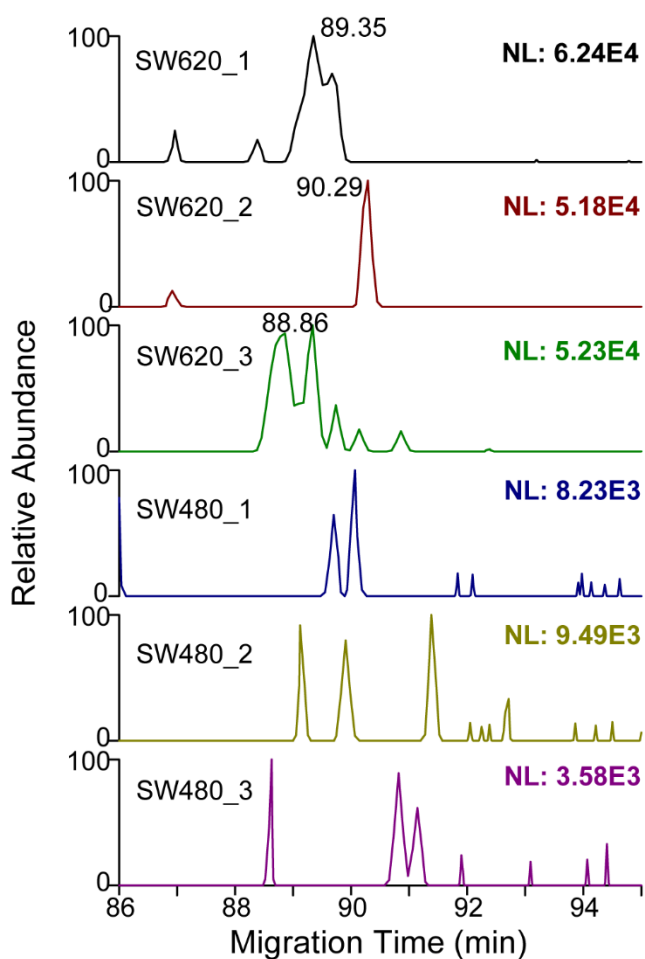

**Fig. S7. Extracted ion electropherograms (EIEs) of one TP53 proteoform containing SAAV (K.LLPENNVLSPLPSQAMDDLMLSPDDIEQWFTEDPGPDEAPRMPEAAPR.V) from SW480 and SW620 cells after triplicate CZE-MS/MS analyses.** Precursor  $m/z$  corresponding to the identified charge state was extracted using 10 ppm mass tolerance and Gaussian smoothing (5 points). Migration time alignment was performed between the SW480 and SW620 data based on the accurate  $m/z$  and charge information. The proteoform intensity in SW480 cells is close to the noise and migration times are not labelled.



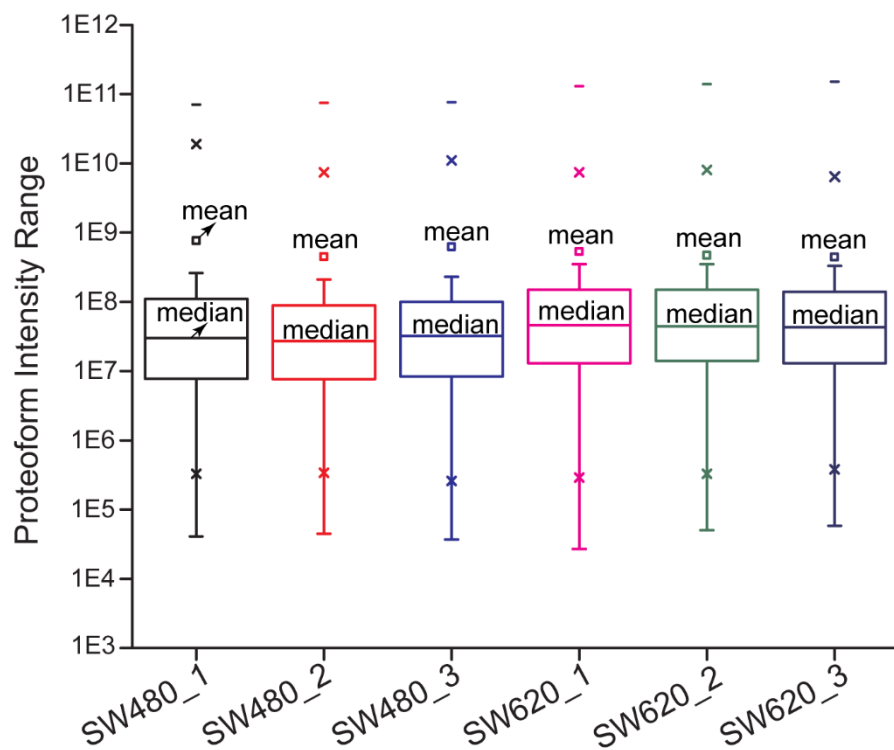

**Fig. S8. Box plots of proteoform intensities from SEC-CZE-MS/MS analyses of SW480 and SW620 cells.** Technical triplicate data of each cell line are shown.

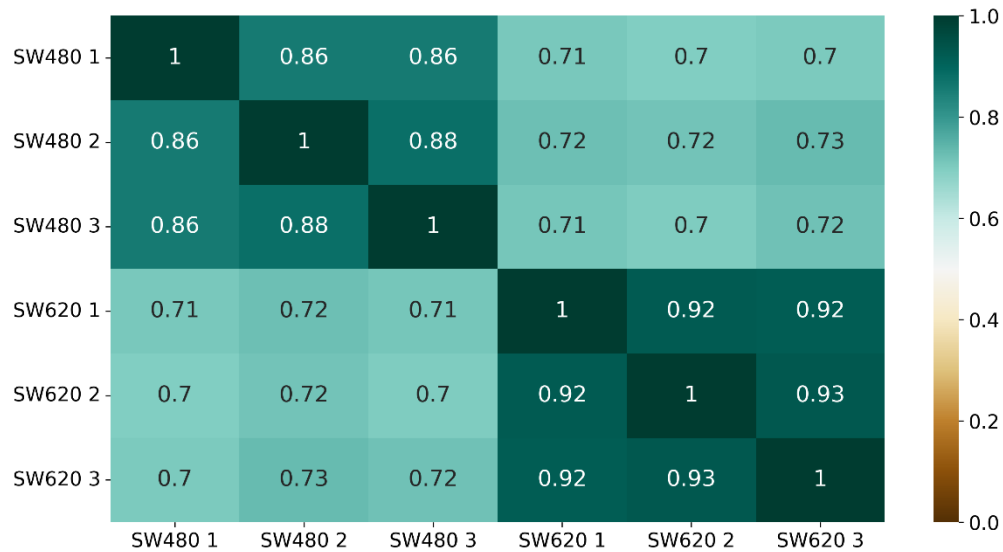

**Fig. S9.** The heat map of Pearson correlation coefficients of proteoform intensities between technical replicates of one cell line and between two cell lines. The shared proteoforms across the six different conditions were used for the analyses. The log<sub>2</sub> transformation was used for proteoform intensity before calculating the Pearson correlation coefficients.

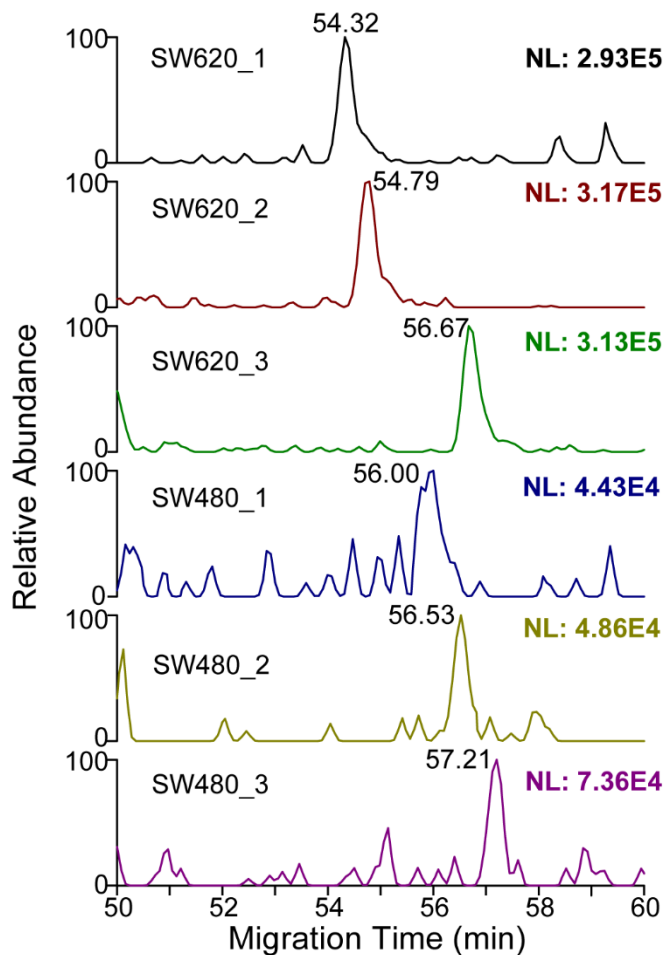

**Fig. S10. Extracted ion electropherograms (EIEs) of the NPM1 phosphorylated proteoform in Table S2 from SW480 and SW620 cells after triplicate CZE-MS/MS analyses.** The proteoform sequence is K.(C)[Carbamidomethylation]GSGP VHISGQHLVAVEEDAE(SE)[mass shift: 79.9682 Da, one phosphorylation]DEEEEDVKLLSISGKR.S. Precursor m/z corresponding to the identified charge state was extracted using 10 ppm mass tolerance and Gaussian smoothing (5 points). Migration time alignment was performed between the SW480 and SW620 data based on the accurate m/z and charge information.

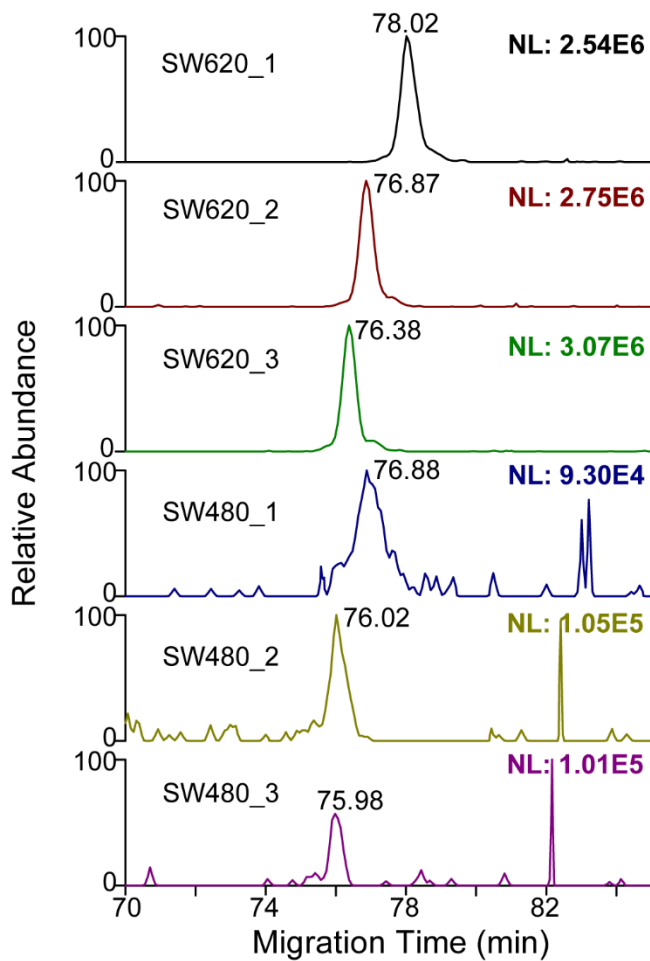

**Fig. S11. Extracted ion electropherograms (EIEs) of the RALY phosphorylated proteoform in Table S2 (R.TRDDGDEEGLLTH(SEELE)[mass shift: 79.9695 Da, one phosphorylation]HSQDTDADDGALQ) from SW480 and SW620 cells after triplicate CZE-MS/MS analyses.** Precursor  $m/z$  corresponding to the identified charge state was extracted using 10 ppm mass tolerance and Gaussian smoothing (5 points). Migration time alignment was performed between the SW480 and SW620 data based on the accurate  $m/z$  and charge information.

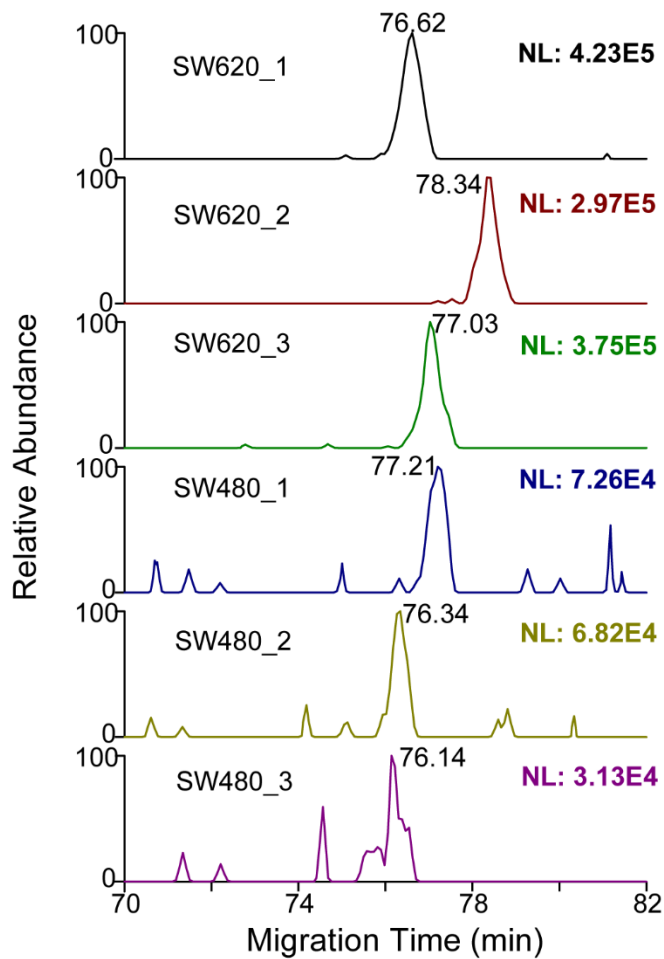

**Fig. S12. Extracted ion electropherograms (EIEs) of the HNRNPC phosphorylated proteoform in Table S2 (R.SAAEMYGSVTEH(PS)[mass shift: 79.9690 Da, one phosphorylation] PSPLLSSSFDLDYDFQRDYDR.M) from SW480 and SW620 cells after triplicate CZE-MS/MS analyses.** Precursor  $m/z$  corresponding to the identified charge state was extracted using 10 ppm mass tolerance and Gaussian smoothing (5 points). Migration time alignment was performed between the SW480 and SW620 data based on the accurate  $m/z$  and charge information.

**Table S1. Summary of proteoform and protein identifications per sample in literature studies and this work.** The sample, strategy, instrument, MS run count, the number of proteoform identification, and the number of protein identification are listed.

| Study | Sample/<br>starting<br>protein<br>material                                                     | Strategy                                                                          | Mass<br>Spectrometer                                                                            | MS run<br>count/sample                                                                                     | Proteoform<br>count/sample                                   | Protein<br>count/sample                                      | Reference                       |
|-------|------------------------------------------------------------------------------------------------|-----------------------------------------------------------------------------------|-------------------------------------------------------------------------------------------------|------------------------------------------------------------------------------------------------------------|--------------------------------------------------------------|--------------------------------------------------------------|---------------------------------|
| 1     | HeLa S3<br>cells<br><br>>4 mg of<br>proteins                                                   | IEF-GELFrEE-<br>RPLC-MS/MS                                                        | 12T LTQ-<br>FTICR                                                                               | >360                                                                                                       | 3,000                                                        | 1,043                                                        | Tran et al.<br>(ref 18)         |
| 2     | H1299 cells<br><br>>4 mg of<br>proteins                                                        | Subcellular<br>Fractionation-<br>IEF- GELFrEE-<br>RPLC-MS/MS                      | Orbitrap Elite                                                                                  | 811                                                                                                        | 5,000                                                        | 1,220                                                        | Catherman<br>et al. (ref<br>19) |
| 3     | DLD-1 cells<br><br>400 µg of<br>proteins                                                       | GELFrEE-RPLC-<br>MS/MS                                                            | 21 T FT-ICR                                                                                     | 40                                                                                                         | 3,238                                                        | 684                                                          | Anderson<br>et al. (ref<br>20)  |
| 4     | <i>E.coli</i> cells<br><br>1 mg of<br>proteins                                                 | SEC-RPLC-CZE-<br>MS/MS                                                            | Q-Exactive<br>HF                                                                                | 43                                                                                                         | 5,705                                                        | 850                                                          | McCool et<br>al. (ref 23)       |
| 5     | 22 samples:<br>21 human<br>cell types<br>and plasma<br><br>Protein<br>amount: not<br>mentioned | Subcellular<br>Fractionation-<br>IEX-GELFrEE-<br>RPLC-MS/MS                       | Orbitrap<br>Fusion<br>Lumos,<br>21 Tesla FT-<br>ICR,<br>Q-Exactive<br>HF, and<br>Orbitrap Elite | 4-367<br>Mean: 70                                                                                          | 300-9,991<br>Mean: 2,582                                     | 79-1,065<br>Mean: 417                                        | Melani et<br>al. (ref 21)       |
| 6     | SW480 and<br>SW620 cells<br><br>500 µg of<br>proteins per<br>cell line                         | SEC-CZE-<br>MS/MS                                                                 | Q-Exactive<br>HF                                                                                | SW480:<br>18 (6 SEC<br>fractions×3<br>replicates)<br><br>SW620:<br>18 (6 SEC<br>fractions×3<br>replicates) | SW480:<br>5,855<br><br>SW620:<br>6,273<br><br>Mean:<br>6,064 | SW480:<br>1,113<br><br>SW620:<br>1,292<br><br>Mean:<br>1,203 | This work                       |
| 7     | SW480 and<br>SW620 cells<br><br>~ 3 mg of<br>proteins per<br>cell line                         | CZE-MS/MS,<br>SEC-CZE-<br>MS/MS,<br>RPLC-CZE-<br>MS/MS,<br>SEC-RPLC-CZE-<br>MS/MS | Q-Exactive<br>HF                                                                                | SW480:<br>~200<br>SW620:<br>~200                                                                           | SW480:<br>17,316<br>SW620:<br>14,504<br><br>Mean: 15,910     | SW480:<br>1,872<br>SW620:<br>1,884<br><br>Mean: 1,878        | This work                       |

**Table S2. Summary of the phosphorylated proteoforms with differential expression between SW480 and SW620 cells.** The gene name, proteoform sequence with PTM annotation, and proteoform intensity ratio (log2) between SW480 and SW620 are listed.

| Gene            | Log2(proteoform intensity ratio, SW480/SW620) | Proteoform Sequence                                                                                                                           |
|-----------------|-----------------------------------------------|-----------------------------------------------------------------------------------------------------------------------------------------------|
| <i>DAP</i>      | 1.53                                          | R.IVQKHPHTGDTKEEKDKDDQEWES(PSPPKPTV)[mass shift: 79.9696 Da, one phosphorylation]FISGVIARGDKDFPPAAAQVAHQKPHASMDKHSPR.T                        |
| <i>DAP</i>      | -1.49                                         | R.IVQKHPHTGDTKEEKDKDDQEWES(PS)[mass shift: 79.9692 Da, one phosphorylation]PPKPTVFISGVIAR.G                                                   |
| <i>HDGF</i>     | 3.45                                          | R.AGDILLED(SPK)[mass shift: 79.9689 Da, one phosphorylation]<br>RPKEAENPEGEEKEAATLEVERPLPMEVEKNSTPSEPGSGRGPPEEE<br>EEEEEEEEATKEDAEAPGIRDHESL. |
| <i>NPM1</i>     | -2.67                                         | K.(C)[Carbamidomethylation]GSGPVHISGQHLVAVEEDAE<br>(SE)[mass shift: 79.9682 Da, one phosphorylation]DEEEEDVKLLSISGKR.S                        |
| <i>RALY</i>     | -5.52                                         | R.TRDDGDEEGLLTH(SEELE)[mass shift: 79.9695 Da, one<br>phosphorylation]HSQDTDADDGALQ.                                                          |
| <i>HIST1H1B</i> | 2.42                                          | M.(S)[Acety]ETAPAETATPA(PVEKS)[mass shift: 79.9702 Da, one<br>phosphorylation]PAKKKATK.K                                                      |
| <i>HMGNI</i>    | 2.01                                          | K.QAEVANQETKEDLPAEN(GETKTEESPAS)[mass shift: 159.9318 Da, two<br>phosphorylation sites]DEAGEKEAKSD.                                           |
| <i>HNRNPC</i>   | -3.09                                         | R.SAAEMYGSVTEH(PS)[mass shift: 79.9690 Da, one<br>phosphorylation]PSPLLSSFDLDYDFQRDYYDR.M                                                     |

**Caption for Suppl. Excel\_seq1 containing the lists of identified proteoforms**

The supplementary excel file contains lists of identified proteoforms from SW480 and SW620 cells using CZE-MS/MS-based strategies, including lists of proteoforms from two cell lines, a list of proteoforms from only SW480 cell line, a list of proteoforms from only SW620 cell line, lists of identified proteoforms related to four well-known CRC-related pathways (WNT/ $\beta$ -catenin Signaling, mTOR Signaling, ERK/MAPK Signaling, PI3K/AKT Signaling pathways), lists of differentially expressed proteoforms between SW480 and SW620 cells, and lists of proteoforms containing SAAVs.
